# Supplementary material for: An intronic ncRNA-dependent regulation of SORL1 expression affecting Aβ formation is upregulated in post-mortem Alzheimer's disease brain samples
Source: PubMed Central journal article supplement — Dis Model Mech. 2012 Sep 20;6(2):424–33. doi: 10.1242/dmm.009761 (PMC3597024; doi:10.1242/dmm.009761), 2012-09-20
Supplement: supp_009761_DMM009761.pdf [file supp_009761_DMM009761.pdf]

## Schematic view of SORL1 protein variants

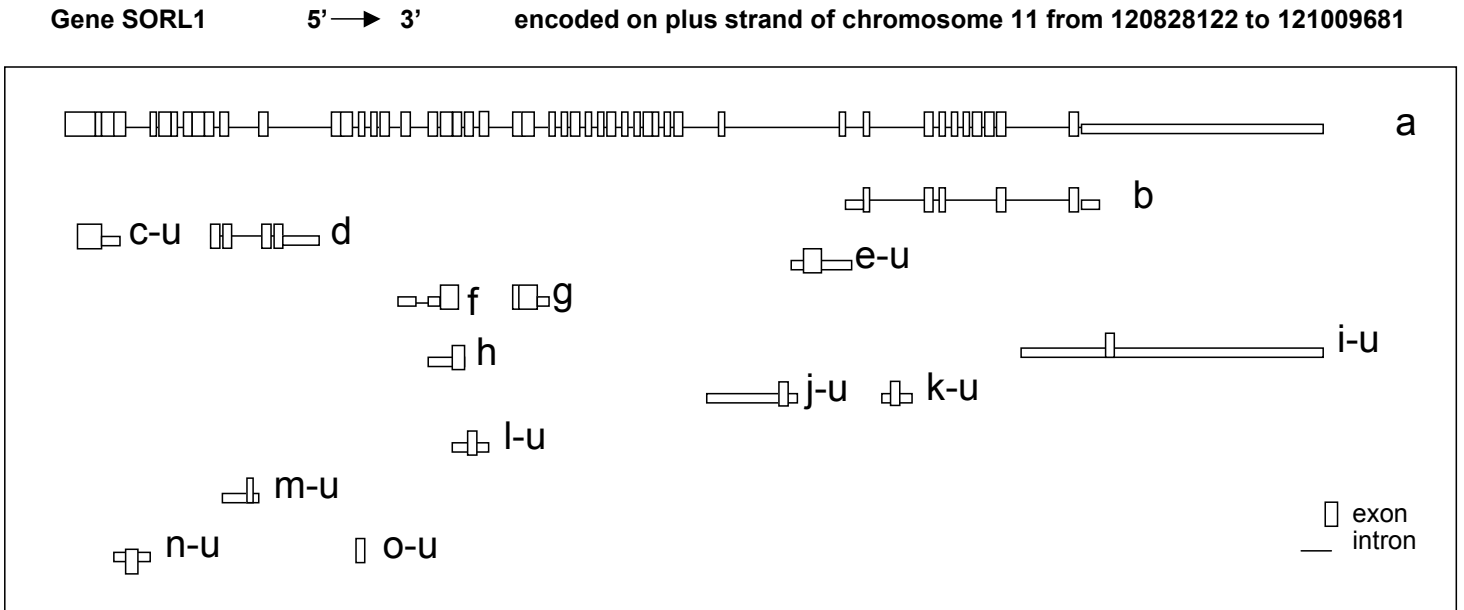

**Fig. S1. A schematic view of the SORL1 locus.** Protein sequences were analyzed in silico showing alternative protein variants (see Aceview annotations at [www.ncbi.nlm.nih.gov/IEB/Research/Acembly](http://www.ncbi.nlm.nih.gov/IEB/Research/Acembly)).
